# Supplementary material for: A Radiogenomics Ensemble to Predict EGFR and KRAS Mutations in NSCLC
Source: Tomography. 2021 Apr 29;7(2):154–68. doi: 10.3390/tomography7020014 (PMC8162978; doi:10.3390/tomography7020014)
Supplement: Supplementary file 1 [file tomography-07-00014-s001.zip]

Archive with 5 entries (5 files):
- Clinical  Data Train and Test sets.pdf
- CNN ARCHITECTURES.pdf
- Features_Transpose_EGFR.xlsx
- Features_Transpose_KRAS.xlsx
- Results Train and Test.pdf
