# Supplementary material for: A Radiogenomics Ensemble to Predict EGFR and KRAS Mutations in NSCLC
Source: Tomography. 2021 Apr 29;7(2):154–68. doi: 10.3390/tomography7020014 (PMC8162978; doi:10.3390/tomography7020014)
Supplement: Supplementary file 1 [file tomography-07-00014-s001.zip › Features_Transpose_KRAS.xlsx]

## Sheet: Features_Transpose_Excel
ID	Mean	Variance	SD	SKEW	Kurtosis	Median	Minimum grey level	10th percentile	90th percentile	Maximum grey level	Interquartile range	range	mean absolute deviation	Robust mean absolute deviation	ENERGY	Root mean square	Histogram ENTROPY	Uniformity	avgCoocurrence-Joint MAX	avgCoocurrence-Joint Average	avgCoocurrence-Joint variance	avgCoocurrence-Joint entropy	avgCoocurrence-Difference average	avgCoocurrence-Difference variance	avgCoocurrence-Difference entropy	avgCoocurrence-Sum average	avgCoocurrence-Sum variance	avgCoocurrence-Sum entropy	avgCoocurrence-Angular second moment	avgCoocurrence-Contrast	avgCoocurrence-Dissimilarity	avgCoocurrence-Inverse difference (Homogeneity)	avgCoocurrence-Inverse difference normalized (Homogeneity normalized)	avgCoocurrence-Inverse difference moment	avgCoocurrence-Inverse difference moment normalized	avgCoocurrence-Inverse variance	avgCoocurrence-Correlation	avgCoocurrence-Autocorrelation	avgCoocurrence-Cluster tendency	avgCoocurrence-Cluster shade	avgCoocurrence-Cluster prominence	avgCoocurrence-First measure of information correlation	avgCoocurrence-Second measure of information correlation	avgSRE (Short runs emphasis)	avgLRE (Long runs emphasis)	avgLGRE (Low grey level run emphasis)	avgHGRE (High grey level run emphasis)	avgSRLGE (Short run low grey level emphasis)	avgSRHGE (Short run high grey level emphasis)
R01-003	-42.9653	29684.6	172.292	-1.47373	1.75852	15	-1000	-325	106	1500	149	255	129.547	76.8043	41746560	177.569	1.82024	0.403589	0.00531079	137.839	824.046	11.2136	16.0689	283.59	5.15087	275.677	2728.56	7.13415	0.00101826	567.628	16.0689	0.188492	0.944378	0.119005	0.991598	0.123814	0.66502	19541	2728.56	-152530	22686830	-0.202741	0.957345	0.963234	1.16641	0.000193633	7489.53	0.000185809	7252.51
R01-004	-74.6794	64549.2	254.065	-1.39834	1.17993	21	-1000	-503	148	1500	245	255	195.486	119.201	108485200	264.813	1.97462	0.363849	0.00309541	133.182	1159.68	11.7209	17.7042	330.321	5.36134	266.364	3970.28	7.47192	0.000561346	668.42	17.7042	0.163886	0.939168	0.0952722	0.990176	0.100449	0.712288	18575.2	3970.28	-185723	35773450	-0.22093	0.971105	0.968893	1.13654	0.00013717	13571.7	0.000132498	13185.5
R01-006	-173.679	41097.1	202.724	-0.966462	-0.0494896	-99	-1000	-484	16	1500	312	255	170.268	128.756	502393500	266.949	2.30491	0.250217	0.0152696	128.77	635.417	10.8073	7.20585	58.2973	3.97445	257.541	2424.32	7.08034	0.00245054	117.349	7.20585	0.299262	0.9734	0.226725	0.998213	0.217299	0.907781	17158.9	2424.32	-85569.3	13522110	-0.230404	0.965311	0.879819	1.77938	0.000136113	11525.3	0.00011918	10090.1
R01-007	-68.2094	68064	260.891	-0.915662	0.24182	5	-1000	-477	196	1500	320	255	207.653	141.747	122236500	269.66	2.21596	0.263868	0.00151677	134.883	1136.82	12.0975	19.8839	310.574	5.59229	269.767	3818.64	7.65432	0.000313494	728.637	19.8839	0.127	0.93145	0.0637476	0.98927	0.0659057	0.682922	18966.7	3818.64	-150876	32677970	-0.221653	0.974636	0.97986	1.08806	0.000155931	12717	0.000152716	12416.5
R01-012	-573.752	50562	224.86	1.09475	0.637739	-633	-1000	-801	-222	1500	260	255	174.683	114.178	85581520000	616.241	2.20289	0.267768	0.00177758	93.2471	532.41	11.5938	8.4348	78.0412	4.30078	186.494	1973.4	7.25534	0.000599034	156.242	8.4348	0.232584	0.969082	0.148347	0.997639	0.153561	0.853453	9149.33	1973.4	96728.7	14462400	-0.163265	0.921491	0.938225	1.30308	0.000167347	11217.5	0.000155467	10621.2
R01-015	10.1037	9926.78	99.6332	-3.29612	13.4845	34	-1000	-66	75	1500	46	255	56.4344	21.0503	906960500	100.144	0.757877	0.777613	0.0214261	150.372	275.411	8.71987	5.16827	68.1044	3.27574	300.745	1002.4	5.6516	0.00805845	99.2439	5.16827	0.384701	0.981092	0.314302	0.998502	0.309323	0.822002	22837.7	1002.4	-85205.6	10150980	-0.159607	0.869628	0.927155	1.37711	0.000185955	9622.9	0.000171758	8873.71
R01-016	-110.593	33672.5	183.501	-1.16185	0.515888	-27	-1000	-394	50	1500	258	255	151.789	109.357	60867750	214.25	2.29703	0.241343	0.010254	134.099	693.027	10.7459	12.6008	140.391	4.72989	268.198	2447.68	7.0828	0.00169791	324.429	12.6008	0.216986	0.955002	0.148397	0.995109	0.149341	0.77222	18515.6	2447.68	-82273.2	15354090	-0.250155	0.972382	0.943475	1.29777	0.000125842	14155.9	0.000117418	13541.7
R01-018	-97.796	61135.2	247.255	-1.8229	1.87931	17	-1000	-578	46	1500	70	255	185.937	96.9857	7726158000	265.893	1.42841	0.571697	0.0539097	140.051	769.811	8.44145	4.45164	58.4969	2.89902	280.103	2996.04	5.82537	0.0166516	83.2072	4.45164	0.465897	0.983693	0.416147	0.99874	0.367362	0.945985	20342.6	2996.04	-258113	35378740	-0.266057	0.957366	0.871236	1.85968	0.000129313	15283.5	0.000111242	13433.6
R01-023	-339.968	119364	345.491	0.00430233	-1.60006	-368	-1000	-778	56	1500	698	255	321.459	285.713	31354170000	484.708	2.30468	0.215124	0.00740041	117.425	1235.49	11.1307	6.14492	55.0881	3.75486	234.85	4844.12	7.4279	0.00129009	97.8366	6.14492	0.313041	0.977273	0.233688	0.998514	0.234861	0.960402	14975.2	4844.12	8859.39	33218710	-0.275618	0.983321	0.9244	1.40031	0.000103169	15491.3	9.47275e-05	14352.8
R01-024	-434.334	123123	350.889	-0.0706062	-1.33259	-442	-1000	-953	27	1500	649	255	307.668	256.945	3636473000	558.363	2.76418	0.151991	0.00550093	104.362	1246.85	12.0333	10.987	123.058	4.64078	208.724	4730.56	7.69154	0.000624021	256.826	10.987	0.228237	0.960425	0.156342	0.996126	0.156073	0.897087	12009.9	4730.56	42862.1	38783940	-0.206892	0.964073	0.911177	1.502	0.000191666	7421.67	0.000172154	6898.39
R01-027	9.55325	20451.7	143.009	-2.67289	10.8829	33	-1000	-97	126	1500	98	255	86.3076	42.3182	601456600	143.328	1.33123	0.456285	0.00463835	149.913	460.9	10.7187	10.3719	183.894	4.54285	299.825	1543.92	6.39304	0.00156054	299.675	10.3719	0.220919	0.963215	0.137512	0.995594	0.142908	0.675219	22786.1	1543.92	-142611	22152280	-0.0867279	0.777082	0.970467	1.12855	0.000137628	14986.8	0.000133374	14560.5
R01-028	-38.0905	45046.3	212.241	-2.51255	6.66501	24	-1000	-301	107	1500	100	255	134.638	54.2256	1480098000	215.632	1.72452	0.375393	0.00563132	145.57	628.574	10.8767	11.048	219.495	4.56856	291.14	2159.87	6.58553	0.00179928	354.425	11.048	0.233351	0.961248	0.152338	0.994795	0.15796	0.722147	21642.2	2159.87	-206487	31438750	-0.101568	0.809267	0.967551	1.14596	0.000137165	15669.9	0.000132462	15155.9
R01-029	-160.838	95143	308.452	-1.28971	0.252818	-10	-1000	-729	72	1500	317	255	251.561	169.463	17757250000	347.867	1.46011	0.475061	0.00661884	134.61	1044.25	10.9331	8.28199	117.484	4.20072	269.22	3984.1	6.83169	0.00186873	192.912	8.28199	0.25992	0.970098	0.175968	0.997125	0.181609	0.90765	19067.8	3984.1	-297499	45964030	-0.167833	0.923343	0.953829	1.21195	0.000103279	17377.4	9.87849e-05	16549.6
R01-031	-99.3896	76669.8	276.893	-1.53417	1.776	3	-1000	-530	134	1500	258	255	210.004	125.588	552003800	294.191	2.0643	0.328844	0.00248582	136.517	1051.69	12.0908	16.7321	312.27	5.31107	273.034	3594.28	7.3657	0.000550106	612.473	16.7321	0.163074	0.942249	0.0921747	0.99102	0.0955457	0.711431	19385.1	3594.28	-238416	40700100	-0.139456	0.909155	0.973765	1.11285	0.000165503	10740.6	0.000161077	10449.8
R01-032	-372.39	192930	439.238	0.118029	-0.586314	-347	-1000	-984	140	1500	798	255	391.16	327.22	38103600000	575.851	1.62603	0.341776	0.000961271	114.725	2015.57	13.546	20.4664	415.232	5.66778	229.449	7207.93	8.06339	0.0001427	854.327	20.4664	0.130364	0.930428	0.0665238	0.987711	0.068437	0.788157	14750.8	7207.93	51237	103446100	-0.11017	0.882307	0.979462	1.08893	0.000142851	16133.6	0.000139297	15825.5
R01-034	-275.173	124077	352.246	-0.434104	-1.01974	-184	-1000	-794	115	1500	604	255	307.825	245.899	7812661000	446.986	2.41901	0.213253	0.000915013	122.239	1311.85	13.2242	18.6212	328.253	5.51131	244.479	4550.48	7.85163	0.000183593	696.93	18.6212	0.14062	0.935903	0.074016	0.989806	0.0772013	0.734765	15906.3	4550.48	-107005	38579310	-0.0999623	0.849352	0.973182	1.11911	0.000116373	16453.2	0.000113136	16001.5
R01-035	-124.25	84181.6	290.141	-1.04251	-0.0674137	-3	-1000	-622	140	1500	377	255	239.105	168.416	1406132000	315.626	2.20741	0.260567	0.00204248	134.259	1076.24	12.1798	13.463	190.007	5.00573	268.519	3919.38	7.40432	0.000486322	385.572	13.463	0.175235	0.952315	0.0995312	0.99426	0.103466	0.821444	18909.2	3919.38	-188959	33211970	-0.131923	0.894498	0.971434	1.13066	0.000116612	16045.5	0.000113118	15565.9
R01-037	-270.146	115781	340.266	-0.581958	-0.93267	-137	-1000	-791	84	1500	568	255	298.027	236.594	2018217000	434.465	2.28905	0.246365	0.00143046	121.181	1320.74	12.6438	16.799	275.462	5.33037	242.361	4701.31	7.66341	0.000295959	581.655	16.799	0.150503	0.94165	0.0806734	0.99144	0.083985	0.78107	15716.2	4701.31	-140626	38919210	-0.137847	0.908776	0.974991	1.10693	0.000110033	16348.9	0.000107274	15923.3
R01-040	-98.2824	62463.3	249.927	-1.63442	1.729	-1	-1000	-541	93	1500	165	255	187.159	103.489	1068137000	268.557	1.85579	0.385496	0.00439365	139.474	786.711	11.2355	11.014	169.895	4.64732	278.948	2844.29	6.86298	0.00128701	302.556	11.014	0.218294	0.960818	0.1381	0.995497	0.143826	0.808799	20088.6	2844.29	-213117	30445060	-0.129346	0.876425	0.960364	1.17637	7.11869e-05	19902.2	6.84047e-05	19109.8
R01-043	-534.953	78100.6	279.465	0.556007	-0.989497	-615	-1000	-839	-74	1500	456	255	241.284	191.337	1635232000	603.552	2.64831	0.180571	0.00232381	94.6806	842.432	11.7947	15.4875	226.939	5.04154	189.361	2857.46	7.38217	0.000506534	512.269	15.4875	0.18281	0.945996	0.112563	0.992385	0.115984	0.698866	9552.22	2857.46	99543.9	18040710	-0.164499	0.906793	0.937435	1.31495	0.000216486	5950.85	0.000201216	5651.53
R01-046	-248.997	129204	359.45	-0.497777	-1.01443	-120	-1000	-797	135	1500	606	255	315.019	250.773	1323703000	437.268	2.38752	0.224616	0.00105969	122.747	1457.17	12.8477	18.1087	291.998	5.4489	245.494	5183.01	7.80984	0.000223838	645.673	18.1087	0.140098	0.937328	0.0731196	0.990506	0.0765572	0.779221	16201.6	5183.01	-135776	45935280	-0.143999	0.919799	0.972907	1.12228	0.000158766	14543.1	0.000154207	14119.4
R01-048	-196.042	95555.3	309.12	-0.775587	-0.87728	-31	-1000	-702	87	1500	516	255	272.181	218.93	1094278000	366.043	2.44828	0.223993	0.0066299	126.72	1226.12	11.4924	11.4234	153.88	4.66961	253.44	4605.42	7.30992	0.00115545	299.036	11.4234	0.225363	0.959236	0.15001	0.995509	0.153591	0.878415	17135.1	4605.42	-165617	36536120	-0.190914	0.94869	0.94305	1.27229	0.000160538	11800.6	0.000150371	11187.9
R01-051	-25.961	27103.8	164.632	-1.19181	2.49304	-2	-1000	-234	146	1500	167	255	119.104	71.9917	309333700	166.667	1.58211	0.435268	0.00183688	145.642	471.77	11.6789	12.8064	152.391	4.95898	291.283	1560.9	6.91687	0.000602268	326.18	12.8064	0.16789	0.954161	0.0914692	0.995121	0.0955801	0.658669	21520.3	1560.9	-92728.2	12333480	-0.0892702	0.803577	0.979118	1.08821	0.000101713	14795.6	9.96232e-05	14480.8
R01-054	-21.5667	39816.6	199.541	-2.35163	5.63357	37	-1000	-277	117	1500	98	255	126.175	49.6088	13634370000	200.703	1.11502	0.607164	0.0053251	149.569	447.603	10.2365	6.90994	66.4763	3.97589	299.137	1671.56	6.24708	0.00206604	118.852	6.90994	0.257646	0.974528	0.168862	0.998216	0.175318	0.867252	22759.1	1671.56	-158026	22447140	-0.119484	0.837063	0.958746	1.1876	7.36824e-05	21071.9	7.07119e-05	20195.7
R01-055	-283.68	163126	403.888	-0.47601	-1.19453	-96	-1000	-908	124	1500	705	255	362.751	299.21	2241363000	493.558	2.25377	0.231135	0.0019003	117.975	1795.94	12.8796	20.8208	477.174	5.64977	235.951	6248.1	7.82988	0.000300153	935.675	20.8209	0.144615	0.929973	0.0793897	0.986559	0.0832438	0.73978	15246.4	6248.1	-118222	61630370	-0.147499	0.92963	0.976758	1.09926	0.000223921	7400.26	0.000218222	7253.17
R01-056	-283.523	173464	416.49	-0.400963	-1.31339	-104	-1000	-901	155	1500	765	255	376.876	316.049	8660565000	503.834	2.30102	0.218367	0.00130236	119.449	1854.35	13.155	20.1813	467.964	5.58107	238.898	6506.68	7.87382	0.0002449	910.709	20.1813	0.147515	0.93212	0.0808517	0.986963	0.0839085	0.754811	15667.2	6506.68	-121645	65441240	-0.112879	0.8727	0.971073	1.12808	0.000168675	13100.7	0.000163742	12710.1
R01-057	-420.694	59989.6	244.928	0.0260818	-1.22158	-415	-1000	-751	-84	1500	430	255	214.618	173.644	836989600	486.799	2.72771	0.157131	0.00235375	105.049	694.715	11.7753	11.2401	104.025	4.7028	210.097	2534.35	7.43705	0.000413307	244.506	11.2401	0.193967	0.95929	0.116977	0.996303	0.121023	0.82483	11607.7	2534.35	21542.7	11247700	-0.183579	0.942389	0.915361	1.46846	0.000194253	6185.13	0.000175722	5772.19
R01-060	-413.249	90241.5	300.402	0.0862533	-0.917979	-432	-1000	-816	4	1500	473	255	254.191	195.54	486795800	510.898	2.52979	0.182972	0.00103061	103.036	1010.68	12.3884	18.1491	230.161	5.43803	206.072	3458.6	7.74345	0.000228457	584.106	18.1491	0.129454	0.93653	0.0644965	0.991321	0.0665677	0.71257	11335.3	3458.6	65391.3	24528890	-0.196454	0.963474	0.975102	1.10631	0.000219929	5786.42	0.000214162	5663.74
R01-061	-315.921	68059.7	260.882	-0.159711	-1.43792	-301	-1000	-674	3	1500	521	255	234.48	201.413	509473100	409.714	2.60222	0.18274	0.00896308	114.573	848.543	11.4182	16.0267	205.051	4.98411	229.145	2873.13	7.30242	0.000959192	521.042	16.0267	0.192984	0.944059	0.128674	0.992216	0.127786	0.70106	13716.3	2873.13	10710.9	13051910	-0.182015	0.9195	0.927866	1.39322	0.000157605	8383.72	0.000145151	7836.52
R01-062	-125.959	67428.5	259.67	-1.07261	0.785637	-48	-1000	-514	127	1500	314	255	204.318	136.599	138518000	288.607	2.22277	0.258121	0.00188543	133.521	998.701	12.022	17.8712	287.598	5.4359	267.042	3367.22	7.54414	0.000364052	627.587	17.8712	0.139709	0.938039	0.0722711	0.990767	0.0756435	0.689908	18514.1	3367.22	-180366	33362460	-0.203135	0.965055	0.979556	1.08994	0.000135247	14659.5	0.000132241	14349.8
R01-063	-198.858	108220	328.968	-0.851083	-0.685848	-33	-1000	-747	100	1500	519	255	285.673	221.299	881416300	384.402	2.26868	0.281685	0.002986	125.806	1341.46	12.0216	15.4026	273.015	5.14384	251.613	4830.76	7.45628	0.00057682	535.088	15.4026	0.178539	0.946532	0.105785	0.99211	0.109655	0.801937	16901.3	4830.76	-181010	40647670	-0.163691	0.931851	0.970568	1.12897	0.000192116	9572.68	0.000186071	9319.14
R01-064	-154.42	88974.2	298.286	-0.805833	-0.177968	-55	-1000	-599	148	1500	439	255	248.54	182.678	124440100	335.886	2.40226	0.227288	0.00171921	126.044	1283.19	11.9074	21.8856	372.447	5.7007	252.088	4245.87	7.729	0.000328003	886.91	21.8856	0.12259	0.925485	0.0615067	0.987037	0.0640397	0.658639	16727.6	4245.87	-102978	33889570	-0.273802	0.988228	0.979465	1.08739	0.000196857	7513.27	0.000192457	7387.62
R01-065	4.34119	29603.9	172.058	-2.13849	9.06756	24	-1000	-156	172	1500	161	255	114.51	67.6739	4371364000	172.113	1.42949	0.451357	0.00147634	151.005	401.467	11.637	13.0366	156.448	4.99126	302.01	1270.92	6.675	0.0005907	334.946	13.0366	0.160867	0.953344	0.0853491	0.995019	0.0890572	0.587747	23036.7	1270.92	-112759	18415290	-0.0448699	0.623801	0.978719	1.08973	8.21186e-05	19313.9	8.04239e-05	18898.1
R01-066	-201.372	79187.4	281.402	-0.853435	-0.763384	-47	-1000	-671	51	1500	455	255	245.969	194.272	3760488000	346.032	2.36713	0.237509	0.00447845	128.809	972.79	11.4201	12.3137	189.583	4.6896	257.618	3520.65	7.13002	0.00109875	370.511	12.3137	0.217306	0.956612	0.140618	0.994478	0.145279	0.812706	17379.6	3520.65	-146437	24543330	-0.151039	0.882063	0.950193	1.23505	0.000156943	10364.5	0.00014822	9911.53
R01-067	-58.9227	48161.9	219.458	-1.97638	4.49591	8	-1000	-363	119	1500	164	255	152.507	80.4312	415393800	227.231	1.56949	0.483856	0.00298834	140.143	829.85	11.8024	14.2883	265.273	5.05425	280.285	2834.24	7.16226	0.000734018	485.159	14.2883	0.18594	0.950234	0.110921	0.992868	0.115799	0.711391	20228	2834.24	-228704	36767310	-0.118998	0.870094	0.962173	1.17239	0.000101755	19576.6	9.77832e-05	18847.6
R01-068	-62.882	81701.5	285.835	-1.51022	1.71523	35	-1000	-516	186	1500	241	255	213.609	122.298	87111750	292.67	2.10487	0.332185	0.00329008	136.707	1390.41	11.3516	20.4529	506.082	5.52628	273.413	4598.36	7.45392	0.000621779	963.285	20.4529	0.153726	0.931665	0.0862712	0.986207	0.0900665	0.661511	19602.5	4598.36	-329176	61850210	-0.274264	0.985965	0.972217	1.12444	0.000162966	14167.8	0.000158205	13746.3
R01-069	-215.489	106861	326.896	-0.717907	-0.488081	-80	-1000	-744	103	1500	507	255	279.079	213.564	54737420000	391.531	1.44388	0.427161	0.00164394	130.576	1104.56	12.3717	11.9083	136.44	4.84593	261.151	4130.07	7.53	0.000418578	288.157	11.9083	0.180071	0.957187	0.102123	0.995687	0.106199	0.86952	18010.6	4130.07	-197181	41086400	-0.139713	0.90864	0.968123	1.1438	0.000112357	17420.7	0.000108523	16853.2
R01-071	-294.396	153506	391.799	-0.376478	-1.34316	-155	-1000	-869	129	1500	731	255	355.11	299.268	739738400	490.076	2.55825	0.193714	0.00150074	112.847	1840.76	12.4067	20.299	442.055	5.57221	225.694	6475.75	7.83037	0.000276733	887.281	20.299	0.14687	0.931501	0.0807526	0.987171	0.0830039	0.760233	14132.2	6475.75	-16189.6	60838170	-0.201266	0.966129	0.964527	1.15982	0.000229821	8682.19	0.000220871	8410.99
R01-072	-233.876	133655	365.589	-0.533133	-0.968831	-122	-1000	-788	161	1500	613	255	319.091	253.883	514393500	433.997	2.57185	0.195446	0.00153132	115.555	1830.29	12.5416	23.6023	509.164	5.81859	231.111	6216.41	7.95654	0.000237802	1104.73	23.6023	0.12759	0.921165	0.0668398	0.9841	0.0703147	0.700533	14632	6216.41	-62412.4	62088090	-0.218153	0.975487	0.96182	1.16918	0.000261899	5335.05	0.000251019	5175.82
R01-073	-304.555	116564	341.414	-0.353734	-1.16567	-243	-1000	-797	78	1500	618	255	301.126	246.099	555318500	457.512	2.53877	0.18436	0.00177797	111.517	1485.9	12.601	19.6209	346.621	5.50232	223.034	5167.21	7.84377	0.00026618	776.381	19.6209	0.147196	0.93298	0.0821572	0.988628	0.0862239	0.740661	13534.5	5167.21	-10295.2	42887500	-0.175212	0.946609	0.962296	1.16914	0.000163644	11323.5	0.000157432	10888.3
R01-077	-385.573	120774	347.525	-0.0752512	-1.26899	-378	-1000	-855	67	1500	638	255	305.195	249.754	6494590000	519.076	2.59766	0.167828	0.000797533	109.979	1266.41	13.2056	20.03	330.733	5.57727	219.958	4297.23	7.8525	0.00015857	768.398	20.03	0.136134	0.931328	0.0724191	0.988715	0.0756133	0.697394	12977.8	4297.23	25234.2	32399310	-0.0977282	0.830289	0.965698	1.15314	0.000171277	9524.87	0.000164852	9228.73
R01-079	-295.011	92950.9	304.879	-0.030705	-0.80088	-282	-1000	-708	91	1500	504	255	259.406	201.286	1129390000	424.243	2.32712	0.216408	0.000656511	116.563	1131.42	12.914	24.8346	401.771	5.82778	233.126	3431.82	7.80216	0.000160055	1093.88	24.8346	0.10726	0.916399	0.0505546	0.984114	0.0532485	0.529067	14174.4	3431.82	15326.3	24854570	-0.149651	0.925703	0.978875	1.08983	0.000172268	9650.96	0.000168227	9491.25
R01-080	-461.987	53902.9	232.17	0.584293	0.156323	-493	-1000	-729	-130	1500	307	255	184.34	127.44	794787300	517.045	2.12851	0.267543	0.000947005	101.874	597.122	12.2704	14.5735	156.635	5.13018	203.748	2004.65	7.4432	0.00027378	383.842	14.5735	0.147906	0.948022	0.0763136	0.994247	0.0807713	0.679736	10783.9	2004.65	52548.9	11846770	-0.135547	0.902079	0.974639	1.11052	0.000129981	12944.4	0.000126493	12640.7
R01-081	-526.415	39478	198.691	0.725346	0.0640363	-562	-1000	-753	-237	1500	265	255	158.925	111.323	1545914000	562.664	2.34431	0.228629	0.00173765	96.0564	429.48	11.3332	8.48339	52.8338	4.3213	192.113	1587.82	7.21289	0.000534715	130.097	8.4834	0.208944	0.968577	0.123406	0.998018	0.12911	0.848678	9591.33	1587.82	48992.9	7996149	-0.196112	0.952448	0.954165	1.20754	0.000194265	5831.39	0.000184911	5587.33
R01-083	-438.385	95328	308.752	0.0945009	-1.44243	-472	-1000	-835	-10	1500	609	255	275.811	235.654	418038000	536.199	2.73073	0.15916	0.00687204	100.859	1096.56	11.4374	18.2791	279.193	5.26907	201.719	3714.29	7.4785	0.000671185	671.95	18.2791	0.169556	0.937044	0.106356	0.990064	0.104494	0.696892	10934.2	3714.29	71251.2	23794280	-0.222418	0.963173	0.903072	1.59143	0.00024561	5005.65	0.000218584	4629.17
R01-084	-242.942	128719	358.774	-0.612045	-0.850494	-93	-1000	-802	115	1500	598	255	311.803	244.219	2479291000	433.289	1.96316	0.314955	0.00126022	124.996	1383.75	12.7463	16.4889	275.141	5.33186	249.993	4971.05	7.71705	0.000279653	563.959	16.4889	0.150574	0.942623	0.0803702	0.991723	0.0840721	0.796388	16730.8	4971.05	-182916	47111520	-0.138226	0.914421	0.978997	1.09067	0.000131384	14632.4	0.000128683	14304.8
R01-091	-451.088	96970.3	311.401	0.411736	-1.25757	-545	-1000	-804	28	1500	565	255	275.129	227.64	699449400	548.134	2.62616	0.179787	0.00221092	100.909	1060.62	11.668	14.0376	171.107	5.03557	201.818	3856.05	7.50435	0.000455778	386.439	14.0376	0.174004	0.950148	0.101776	0.994203	0.106638	0.818068	11050.3	3856.05	140245	29264210	-0.219115	0.968693	0.943244	1.27239	0.00016808	11272.6	0.000156918	10762.1
R01-094	-315.684	148016	384.729	-0.311466	-1.33169	-215	-1000	-869	95	1500	709	255	347.556	292.328	775462900	497.667	2.4489	0.214448	0.00212807	113.335	1682.15	12.4687	18.0078	342.181	5.39808	226.669	6031.12	7.80666	0.000341053	697.471	18.0078	0.159515	0.938273	0.0915537	0.989816	0.095326	0.793215	14179.6	6031.12	-19266.6	54599770	-0.190825	0.958669	0.965492	1.15516	0.000228961	6485.5	0.000220243	6305.97
R01-096	-358.416	151114	388.734	0.0615769	-1.31834	-393	-1000	-852	131	1500	726	255	348.361	289.969	2217596000	528.749	2.43245	0.197461	0.000788139	110.838	1596.62	13.0401	19.4493	350.974	5.5744	221.676	5633.31	7.92986	0.000174994	753.189	19.4493	0.133861	0.93332	0.0685192	0.98902	0.071441	0.76457	13505.2	5633.31	105790	53578370	-0.146557	0.928499	0.975682	1.10405	0.00020558	6952.18	0.000200296	6808.46
R01-097	-365.505	181573	426.113	-0.112145	-1.35963	-322	-1000	-971	138	1500	802	255	382.563	321.367	1796767000	561.397	2.45673	0.202385	0.000936437	109.926	1949.38	13.1123	24.5915	567.31	5.88354	219.853	6576.21	8.02956	0.000165999	1221.32	24.5915	0.122156	0.918512	0.0622362	0.982618	0.0643968	0.68792	13423	6576.21	40857.7	70453890	-0.159339	0.94151	0.972039	1.12113	0.000196242	11280.8	0.000190072	10999.9
R01-100	-528.602	66062.9	257.027	0.774035	2.00826	-559	-1000	-839	-174	1500	361	255	206.943	149.402	13096580000	587.778	1.5185	0.380426	0.000717887	96.3374	721.756	12.5456	13.3392	131.977	5.00617	192.675	2565.15	7.5826	0.000231272	321.872	13.3392	0.157809	0.952068	0.0838784	0.995161	0.0875958	0.777383	9841.79	2565.15	96190.3	27452680	-0.119825	0.876948	0.967154	1.14627	0.00019328	9981.15	0.000186206	9683.43
R01-103	-112.536	116993	342.042	-0.298477	4.70359	15	-1000	-680	153	1500	349	255	259.21	166.776	12000280000	360.079	1.52291	0.375466	0.00200103	135.579	1314.58	12.4018	15.583	280.752	5.21115	271.158	4716.78	7.44785	0.000526766	541.533	15.583	0.168514	0.94588	0.0956918	0.992041	0.0990442	0.79425	19425.8	4716.78	-261002	63825660	-0.110068	0.861027	0.96994	1.1305	0.000191842	9501.62	0.000185561	9235.05
R01-104	-488.837	97396.6	312.084	0.406417	-0.746719	-542	-1000	-865	-31	1500	491	255	263.414	200.487	6254247000	579.964	2.22969	0.2292	0.00063079	101.672	1025.67	12.9591	16.0396	185.877	5.28934	203.344	3645.51	7.78125	0.00017174	457.157	16.0396	0.137196	0.943209	0.0686368	0.993172	0.071534	0.777252	11135.9	3645.51	101640	29388560	-0.118412	0.885422	0.980147	1.08353	0.000136556	14592.4	0.000133508	14335.5
R01-105	-99.5815	86797.1	294.613	-1.09872	0.111898	35	-1000	-594	154	1500	385	255	243.44	171.71	1647419000	310.988	1.86839	0.387157	0.002879	138.295	1089.67	12.0791	15.7823	304.316	5.15821	276.59	3775.12	7.36915	0.000653461	583.556	15.7823	0.178613	0.945574	0.10576	0.991464	0.109788	0.729476	19931.7	3775.12	-201270	37012000	-0.137455	0.893775	0.971275	1.12542	0.000107735	16019.2	0.000104777	15535.3
R01-106	-158.195	100316	316.728	-0.975275	-0.273409	5	-1000	-697	109	1500	438	255	267.663	197.03	2101863000	354.037	2.11753	0.264116	0.0059787	131.329	1225.92	12.1317	17.2102	375.93	5.2217	262.659	4192.94	7.38071	0.00101083	710.755	17.2102	0.193739	0.941492	0.125412	0.989662	0.128262	0.713079	18118.2	4192.94	-185975	36779830	-0.126872	0.877158	0.968058	1.14781	0.000164272	11919.4	0.000158478	11545.6
R01-109	-473.555	86315.2	293.795	0.354946	-1.27818	-540	-1000	-819	-23	1500	538	255	258.887	214.049	1787947000	557.287	2.74438	0.155857	0.00497675	103.052	956.09	11.4898	9.73033	87.8675	4.41826	206.104	3626.28	7.45991	0.000652678	198.077	9.73033	0.232424	0.964589	0.155817	0.996998	0.157804	0.897003	11478.6	3626.28	83422.2	22534090	-0.224519	0.960848	0.920691	1.44088	0.000149954	11677.2	0.000137573	10729.5
R01-110	-297.641	64608.3	254.182	-0.213801	-1.26625	-269	-1000	-658	13	1500	472	255	224.795	186.25	849637300	391.405	2.27838	0.215104	0.00287667	120.118	769.923	11.6771	9.9297	88.3999	4.5191	240.237	2881.74	7.4679	0.000502582	197.956	9.92971	0.213488	0.963804	0.134224	0.997002	0.138604	0.872128	15100	2881.74	-4715.11	16166570	-0.205276	0.956907	0.943635	1.27173	8.7351e-05	18183	8.21306e-05	17220.1
R01-112	-75.9032	56520	237.739	-2.03123	3.26273	10	-1000	-495	81	1500	93	255	164.793	70.9248	9552208000	249.562	1.20074	0.583458	0.00851234	143.223	662.282	10.3841	8.02248	127.356	4.09278	286.446	2449.66	6.40729	0.00268338	199.465	8.02248	0.276168	0.971176	0.193198	0.99704	0.198469	0.849557	21075.4	2449.66	-223482	31978030	-0.133607	0.86266	0.955014	1.21598	0.000110298	16409.6	0.000105863	15583.5
R01-113	-479.811	150055	387.369	0.36249	-1.15122	-560	-1000	-946	75	1500	705	255	337.35	272.943	16943080000	616.663	2.36488	0.2109	0.000836114	101.762	1515.14	13.1928	16.874	320.202	5.35641	203.525	5437.56	7.95766	0.000188367	623.004	16.874	0.158598	0.941768	0.0887629	0.990928	0.0923119	0.794485	11559.2	5437.56	179590	57826770	-0.126144	0.901326	0.962794	1.16774	0.000197541	9739.92	0.000189496	9418.92
R01-115	-267.616	115147	339.334	-0.51031	-1.1365	-150	-1000	-780	94	1500	596	255	301.013	248.193	187513100	432.164	2.63674	0.179235	0.00262821	115.822	1490.73	11.5427	18.6186	302.328	5.41924	231.643	5281.25	7.66132	0.00045997	681.666	18.6186	0.148761	0.935833	0.0818958	0.989927	0.0838883	0.772958	14565.5	5281.25	-66156.9	42657650	-0.28443	0.988507	0.96872	1.13963	0.000184815	10567.9	0.000178672	10241.5
R01-116	-301.634	215202	463.899	-0.172846	-1.38261	-183	-1000	-955	226	1500	871	255	422.02	358.138	487139900	553.34	2.36091	0.214321	0.00138653	114.22	2262.98	12.2561	24.2332	625.187	5.84722	228.44	7803.5	8.00307	0.000259527	1248.41	24.2332	0.12863	0.920105	0.0672503	0.982354	0.0706231	0.724228	14686.9	7803.51	54193.4	95490710	-0.278615	0.990264	0.977495	1.09576	0.000220956	7532.81	0.000215557	7404.45
R01-117	-480.757	198491	445.523	0.416281	-1.31081	-628	-1000	-987	152	1500	875	255	399.518	336.532	10289790000	655.453	2.24129	0.248246	0.00145731	100.596	2015.78	12.9676	18.2354	397.808	5.45183	201.191	7309.35	7.90257	0.000240488	753.786	18.2354	0.15389	0.937912	0.084997	0.989148	0.0887183	0.813153	11758.4	7309.35	327014	95828080	-0.139984	0.918226	0.971335	1.12386	0.000241361	6357.9	0.000233758	6216.93
R01-118	-308.303	159365	399.206	-0.511421	-1.28922	-101	-1000	-922	89	1500	731	255	362.106	304.908	10644270000	504.397	2.17402	0.274824	0.00198703	119.519	1677.39	12.5512	15.1734	283.178	5.16763	239.039	6178.05	7.61437	0.000436173	531.532	15.1734	0.172723	0.947318	0.0990176	0.992221	0.103103	0.841703	15696.6	6178.05	-207730	61167600	-0.134796	0.904582	0.970252	1.12962	0.000181026	11172.6	0.000175426	10831.4
R01-119	-463.692	178555	422.558	0.283436	-1.40854	-591	-1000	-958	98	1500	840	255	385.379	331.595	18882070000	627.348	1.93353	0.298012	0.000839099	103.097	1811.82	12.9791	17.3707	343.603	5.39054	206.194	6579.47	7.81259	0.000224585	667.801	17.3707	0.152546	0.940318	0.0827346	0.990329	0.0863475	0.815671	12107	6579.47	209017	72011240	-0.12444	0.893754	0.972272	1.11997	0.000197335	10062	0.0001914	9799.9
R01-122	-450.459	183390	428.24	0.320817	-1.2825	-543	-1000	-952	136	1500	827	255	382.583	320.075	2764382000	621.533	2.33672	0.222487	0.00109145	101.926	1844.72	13.0362	20.2616	408.667	5.62955	203.851	6532.74	7.94032	0.000203672	846.139	20.2616	0.136393	0.931167	0.071611	0.98778	0.0746794	0.770943	11810.5	6532.73	254229	79134670	-0.149065	0.931636	0.971158	1.126	0.000229502	6266.56	0.000222305	6125.05
R01-125	-210.85	102570	320.265	-0.711155	-0.915353	-61	-1000	-722	94	1500	547	255	281.365	226.282	206720200	383.441	2.5116	0.214276	0.00402545	120.082	1462.48	11.3914	19.2002	367.224	5.42353	240.163	5078.14	7.51636	0.000644211	771.787	19.2002	0.161242	0.934583	0.0947777	0.98867	0.0984741	0.738366	15496.8	5078.14	-100686	39967050	-0.267037	0.984172	0.966962	1.14709	0.00019641	8523.1	0.000189282	8280.86
R01-126	-658.901	104205	322.808	0.999912	-0.248401	-781	-1000	-968	-58	1500	411	255	264.761	190.889	9049748000	733.727	2.27147	0.255027	0.00182407	83.4182	1043.14	12.0759	13.9789	205.537	5.05671	166.837	3755.2	7.3575	0.000453065	417.36	13.9789	0.174812	0.950689	0.100339	0.993798	0.10414	0.800343	7793.06	3755.2	262382	43843880	-0.126781	0.884471	0.953576	1.2102	0.000296967	4320.57	0.000281946	4155.83
R01-127	-664.127	44869.5	211.824	1.29126	2.00647	-700	-1000	-890	-381	1500	241	255	158.391	102.439	10870820000	697.089	1.97868	0.304562	0.00211613	83.4607	479.376	11.5727	10.1007	122.728	4.55291	166.922	1681.96	7.15298	0.000592607	235.537	10.1007	0.213607	0.96356	0.132074	0.996478	0.137134	0.755041	7327.31	1681.96	86592.1	13804330	-0.143568	0.893666	0.945112	1.25919	0.000196424	9880.98	0.000184714	9390.66
R01-129	-409.084	110384	332.241	0.380109	-1.19208	-518	-1000	-781	60	1500	645	255	295.747	246.942	8490320000	527.005	2.10937	0.264668	0.00123896	109.375	1164.34	12.3003	12.5046	154.251	4.92697	218.749	4337.27	7.53016	0.0003357	320.108	12.5046	0.175178	0.955249	0.0982501	0.995224	0.101943	0.862414	12967.5	4337.27	143836	35394880	-0.150867	0.925326	0.967407	1.1419	0.000140421	12685.8	0.00013576	12273.5
R01-130	-400.204	137771	371.175	0.22597	-1.29086	-482	-1000	-842	105	1500	694	255	331.377	275.056	7753435000	545.833	2.38229	0.206255	0.000666607	109.884	1430.1	12.9276	15.6776	261.231	5.22102	219.769	5189.63	7.81675	0.000208504	530.776	15.6776	0.153734	0.945341	0.0816731	0.992242	0.0853267	0.814946	13239.3	5189.63	119834	45433630	-0.136141	0.903324	0.978495	1.09135	0.00020022	8760.11	0.000195686	8590.42
R01-131	-610.039	88671.3	297.777	0.761902	-0.394346	-688	-1000	-924	-142	1500	445	255	248.736	185.576	6780495000	678.837	2.34845	0.223035	0.00194923	88.1597	891.793	12.3334	14.1638	200.595	5.11167	176.319	3153.9	7.47858	0.000389947	413.269	14.1638	0.166549	0.949917	0.0928533	0.993864	0.0973771	0.768626	8457.31	3153.9	154230	27543050	-0.129489	0.897865	0.962345	1.16696	0.000247821	5025.49	0.000237893	4866.93
R01-132	-525.522	63707.9	252.404	0.856816	-0.46123	-618	-1000	-780	-91	1500	351	255	210.175	154.207	4189036000	582.993	2.55051	0.203096	0.00259951	97.2517	681.546	11.3109	8.67537	79.367	4.21968	194.504	2556.52	7.30439	0.000761694	169.66	8.67538	0.247701	0.968325	0.168114	0.997433	0.170859	0.876297	10054.7	2556.53	114738	17309700	-0.213967	0.944067	0.9177	1.4698	0.000167317	9661.91	0.000150999	9078.73
R01-133	-421.453	121850	349.07	0.179656	-1.41947	-479	-1000	-855	63	1500	691	255	311.452	264.241	16335340000	547.241	2.59294	0.17842	0.00227281	107.469	1285.84	12.2871	11.9667	150.644	4.78235	214.937	4833.51	7.69341	0.000417131	309.85	11.9667	0.206637	0.957252	0.131401	0.995349	0.135636	0.879626	12680.4	4833.51	88861.7	38309010	-0.173109	0.938029	0.945211	1.26192	0.00019409	7881.35	0.000182052	7521.83
R01-134	-325.56	127321	356.82	0.0111788	-1.16926	-334	-1000	-791	131	1500	640	255	315.442	257.818	6876344000	483.022	1.98918	0.259705	0.000620533	118.355	1319.67	13.0859	17.2906	224.936	5.41415	236.711	4741.77	7.84247	0.000158941	536.93	17.2906	0.131633	0.939274	0.0652988	0.992042	0.0680576	0.796839	15062	4741.77	10606.6	38526090	-0.12831	0.907573	0.982716	1.07267	0.000124332	15932.8	0.000121622	15715.1
R01-135	-290.023	145835	381.884	-0.324774	-1.3346	-163	-1000	-840	136	1500	708	255	344.953	289.222	15206040000	479.53	2.36339	0.220111	0.000878953	119.694	1597.46	13.0128	18.2482	318.035	5.45901	239.388	5712.23	7.79029	0.000215249	677.611	18.2482	0.140688	0.937124	0.0730278	0.990077	0.0760678	0.789093	15585.7	5712.23	-82535.9	49462350	-0.110929	0.867545	0.972358	1.11871	0.000153367	13955.5	0.000148708	13602.4
R01-137	-648.209	77157.3	277.772	1.02453	0.376637	-727	-1000	-938	-212	1500	342	255	220.586	149.739	16586030000	705.218	1.9514	0.302011	0.00112777	85.6922	795.577	12.4784	14.9646	190.392	5.17597	171.384	2750.58	7.45279	0.000302914	431.727	14.9646	0.15494	0.947056	0.0834489	0.993566	0.0867176	0.728389	7922.95	2750.58	170041	29911150	-0.0982887	0.824259	0.969371	1.13293	0.000180874	10186.9	0.000174905	9905.05
R01-139	-375.461	148979	385.978	0.00931699	-1.56883	-415	-1000	-858	90	1500	769	255	356.701	312.786	18655360000	538.47	2.35385	0.223298	0.00176749	111.665	1556.92	12.5223	14.8531	261.65	5.12716	223.33	5724.96	7.61695	0.00037135	502.737	14.8532	0.175342	0.948248	0.101557	0.992613	0.105872	0.838833	13774.6	5724.96	61382.8	46493210	-0.135464	0.901351	0.967902	1.14145	0.000182459	9936.14	0.00017624	9637.63
R01-140	-167.667	90734.2	301.221	-1.24673	0.255631	-35	-1000	-723	82	1500	312	255	242.627	161.987	1373034000	344.741	2.15883	0.280007	0.00303273	129.402	1228.06	11.8086	16.6333	356.941	5.22699	258.804	4251	7.19044	0.000709404	661.224	16.6333	0.171948	0.943144	0.0990545	0.990367	0.103143	0.732946	17642.5	4251	-254228	42223470	-0.123799	0.876396	0.97097	1.12548	0.00016959	10826.6	0.000164579	10517.9
R01-141	-326.976	141579	376.27	-0.218895	-1.2584	-271	-1000	-855	114	1500	691	255	334.294	275.635	3098198000	498.49	2.35566	0.202685	0.000865086	115.692	1496.14	13.1017	19.3297	335.66	5.56423	231.384	5251.46	7.9153	0.000172349	733.094	19.3297	0.134308	0.933582	0.0690152	0.989277	0.0720661	0.755121	14514.3	5251.46	-26295.7	45132470	-0.132722	0.910829	0.975143	1.10622	0.000179574	8423.49	0.000174821	8235.98
R01-142	-276.532	93683.4	306.077	-0.275833	-1.07816	-234	-1000	-717	94	1500	530	255	265.363	211.563	3852615000	412.497	2.47947	0.192313	0.000794479	122.725	994.974	12.7857	14.8983	176.094	5.17842	245.451	3567.62	7.71844	0.000196529	412.276	14.8983	0.148299	0.947089	0.0769752	0.993842	0.0805746	0.793143	15851	3567.62	-47539.6	22882760	-0.124834	0.892093	0.978932	1.08903	0.000103108	16259.9	0.000100779	15941
R01-144	-457.098	115430	339.751	0.40574	-1.19406	-560	-1000	-838	37	1500	626	255	300.309	246.429	2283232000	569.534	2.44781	0.205611	0.00126619	102.837	1167.48	12.4719	17.1248	274.848	5.35775	205.674	4076.78	7.59459	0.000284469	593.131	17.1249	0.148899	0.940535	0.0798796	0.991263	0.0830567	0.7464	11446.5	4076.78	149276	32296890	-0.140974	0.911313	0.973192	1.11825	0.000170542	9492.7	0.000165646	9266.75
R01-145	-259.742	134406	366.615	-0.479984	-1.30398	-80	-1000	-809	114	1500	684	255	332.985	280.959	12151720000	449.302	1.96796	0.26323	0.00158679	123.577	1450.94	12.4585	14.1215	232.955	5.09211	247.155	5359.7	7.55399	0.000384314	444.055	14.1215	0.170998	0.950402	0.0957769	0.993456	0.0997106	0.847065	16500.4	5359.7	-149795	44725960	-0.133948	0.906765	0.969373	1.13301	0.000159675	11830	0.000154168	11514.3
R01-146	-85.4502	64122.7	253.225	-1.27465	0.435459	45	-1000	-539	109	1500	288	255	205.918	140.026	17191570000	267.253	1.41905	0.501	0.0116168	142.431	731.158	10.2805	5.40563	47.1414	3.55059	284.863	2844.36	6.81068	0.00311469	80.2762	5.40563	0.332762	0.979929	0.25267	0.99878	0.255512	0.945031	20977.8	2844.36	-177601	25391360	-0.246703	0.968445	0.921224	1.40701	9.10184e-05	17431	8.36877e-05	16034.6
[truncated: 230 more columns]

## Sheet: Hoja1
	65			67
	52			62
	67			68
	76			70
	81			74
	56			64
	72			67
	67			81
	70			76
	63			64
	70			63
	70			64
	80			78
	81			84
	54			64
	69			66
	65			77
	79			70
	50			69
	65			71
MEDIANA	68			65
MIN	50			53
MAX	81			67
				65
				81
				80
				65
				63
				70
				72
				70
				75
				85
				71
				47
				68
				63
				64
				74
				76
				63
				69
				59
				78
				78
				67
				65
				80
				67
				76
				73
				81
				68
				62
				73
				62
				69
				46
				79
				55
				80
				77
				81
			MEDIANA	69
			MIN	46
			MAX	85
